# Supplementary material for: "Three-in-One" Multi-Scale Structural Design of Carbon Fiber-Based Composites for Personal Electromagnetic Protection and Thermal Management
Source: PubMed Central journal article supplement (PMC10333170; doi:10.1007/s40820-023-01144-z), 2023-07-10
Supplement: 40820_2023_1144_MOESM2_ESM.pdf [file 40820_2023_1144_MOESM2_ESM.pdf]

Supporting Information for

## **"Three-in-One" Multi-scale Structural Design of Carbon Fiber-based Composites for Personal Electromagnetic Protection and Thermal Management**

Ming Zhou<sup>1</sup>, Shujuan Tan<sup>1,\*</sup>, Jingwen Wang<sup>1</sup>, Yue Wu<sup>1</sup>, Leilei Liang<sup>2</sup>, Guangbin Ji<sup>1</sup>

<sup>1</sup> College of Materials Science and Technology, Nanjing University of Aeronautics and Astronautics, No. 29 Yudao Street, Nanjing 210016, P.R. China

<sup>2</sup> School of Electronic Science and Engineering, Nanjing University, Nanjing, 210093 P. R. China

\*Corresponding author. E-mail: [tanshujuan@nuaa.edu.cn](mailto:tanshujuan@nuaa.edu.cn) (Shujuan Tan)

### **Supplementary Figures and Tables**

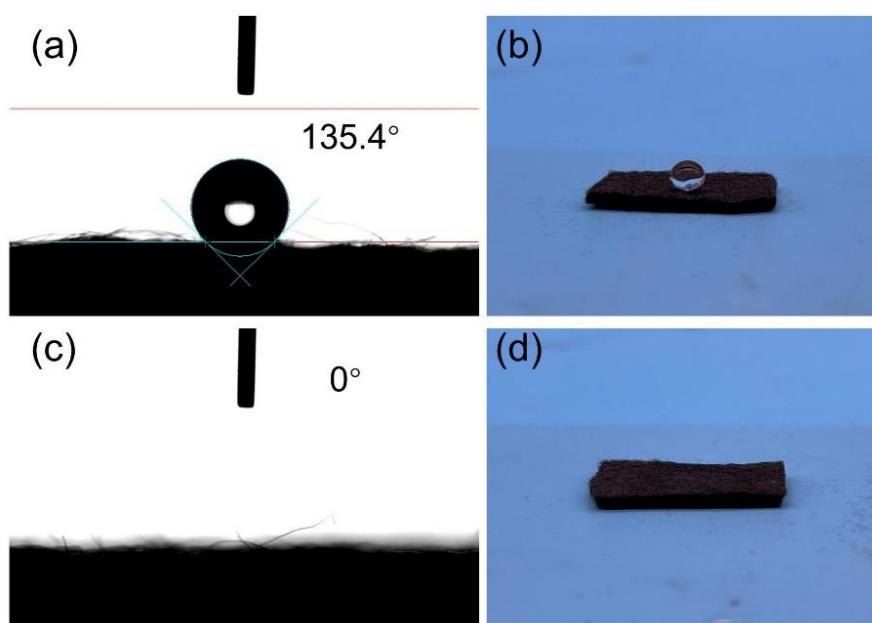

**Fig. S1** WCA of the pristine CF (a) and the PDA modified CF (c). The digital images of water on the pristine CF (b) and the PDA modified CF (d)

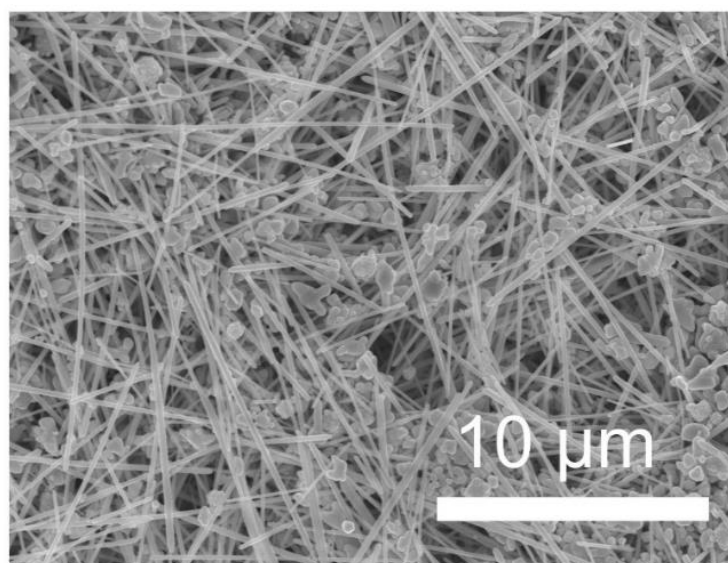

**Fig. S2** SEM image of the synthesized AgNWs

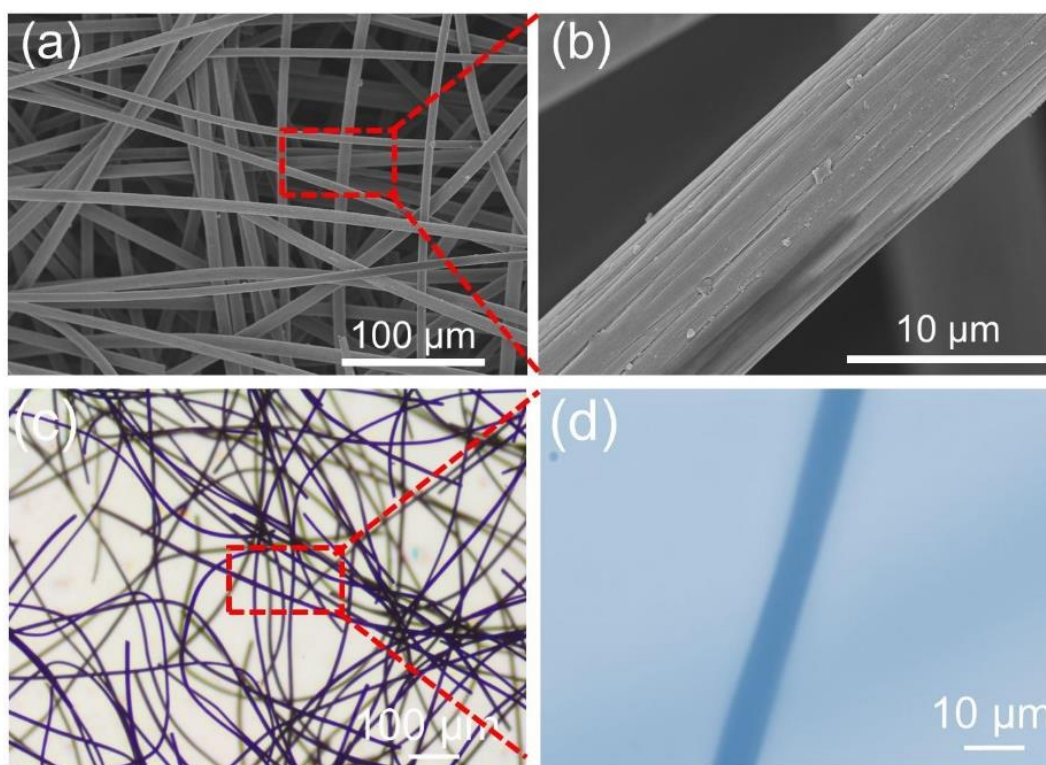

**Fig. S3** SEM images of the pristine carbon fiber with different magnifications (a, b). Microscopic photographs of the pristine carbon fiber with different magnifications (c, d)

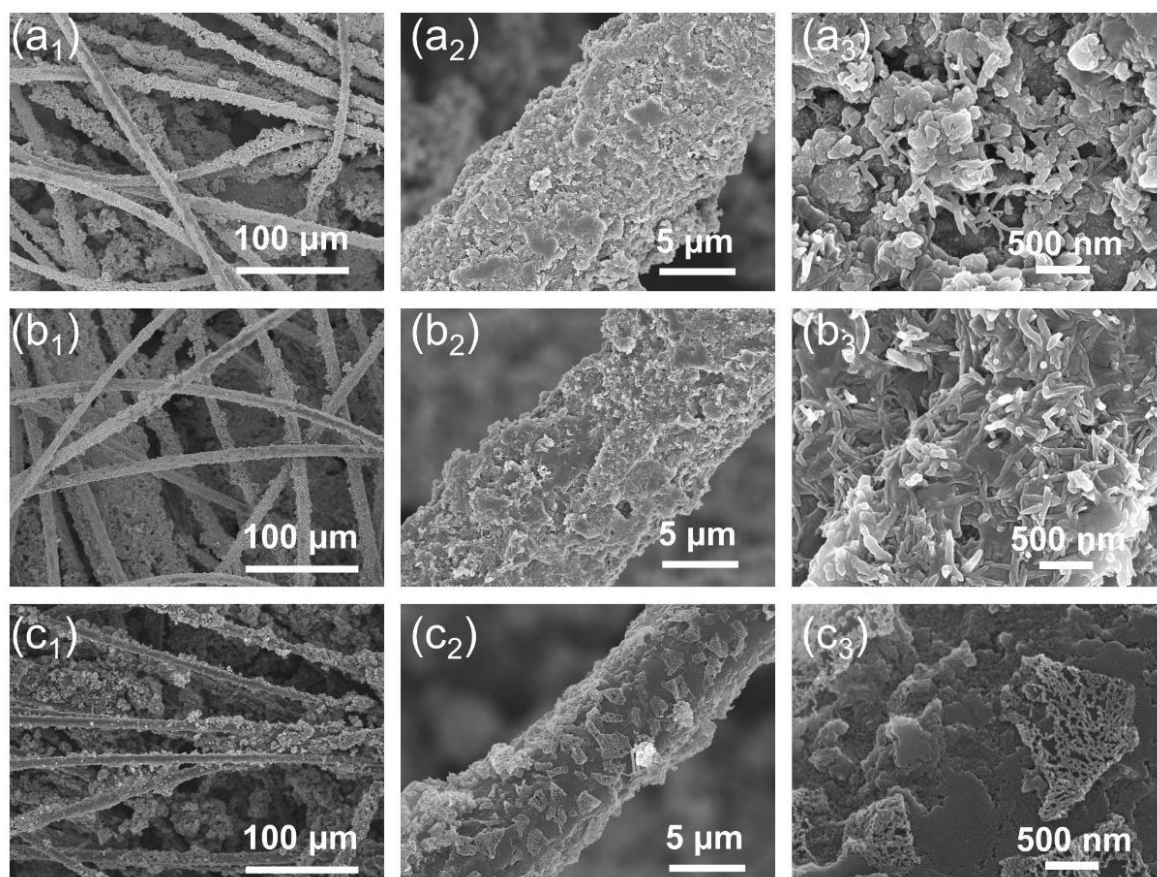

**Fig. S4** SEM images with different resolutions of (a) PA1, (b) PA2, and (c) PA4

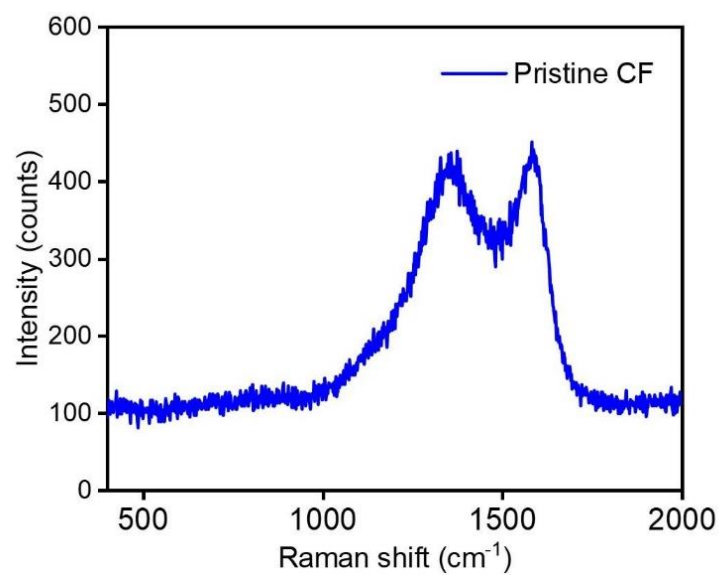

**Fig. S5** Raman spectrum of pristine CF



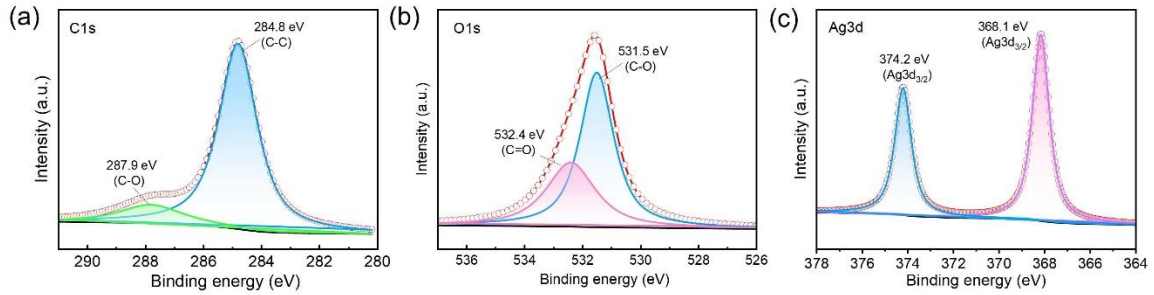

**Fig. S6** C 1s (a), O 1s (b) and Ag 3d (c) XPS spectrum of PAg3

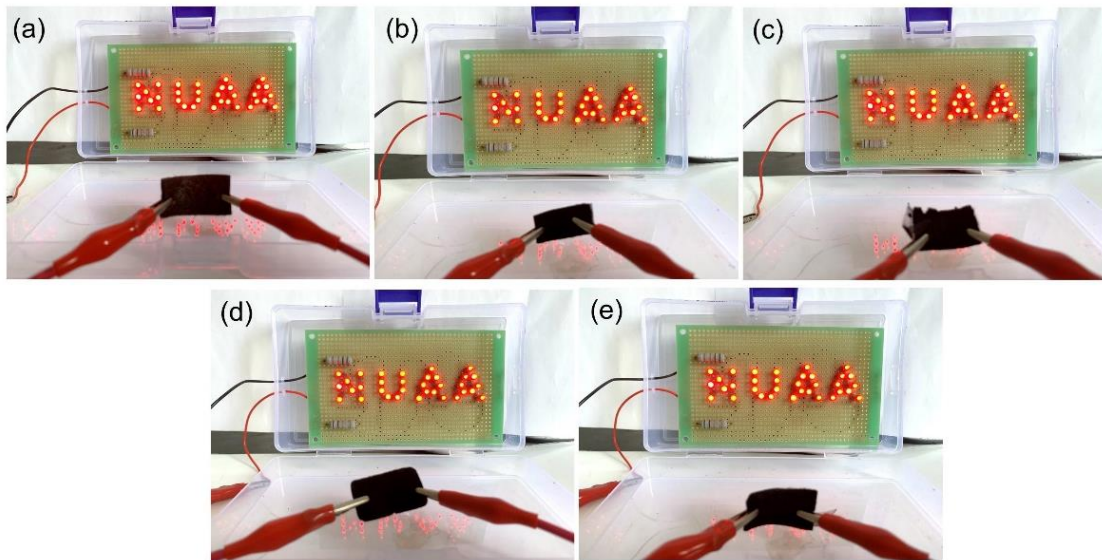

**Fig. S7** Digital of PA0 (a), PA1 (b), PA2 (c), PA3 (d) and PA4 (e) in closed circuits

### Simulation of Specific absorption rate (SAR): Comsol Multiphysics

software (version of 6.0) was employed to observe the influences of electromagnetic radiation on the human brain. And the SAR is usually evaluated by the following formula:

$$E_{SAR} = \sigma \frac{|E|^2}{\rho}$$

Where  $\sigma$  is denoted as the electric conductivity of the human tissue and  $\rho$  is the density.  $E$  is the effective value of spatial field strength in human tissue, it can be expressed by the formula:

$$E = \sqrt{E_x^2 + E_y^2 + E_z^2}$$

To simulate the impact of electronic devices used in daily life, for example, the mobile phone on the human brain, a model, including the human brain and a microstrip patch antennae, was built, where the antenna was 0.1m to the left of human brain. It is noted that the radiation frequency was set as 0.853 GHz, which is the frequency band

commonly used for cell phone communication. The heat change of human brain under antenna radiation was analyzed in the process of simulation. The excitation mode of electromagnetic field was selected as the Lumped Port. In addition, to eliminate unnecessary scattered radiation, Perfectly Matched Layer (PML) was chosen as the boundary of the model (Fig. S8). And this model solves the vector-Helmholtz equation for a given frequency everywhere in the domain:

$$\nabla \times \frac{1}{\mu_r} \nabla \times E - k_0^2 \epsilon_r E = 0$$

Where  $\mu_r$  and  $\epsilon_r$  represent relative permeability and relative permittivity, respectively. And  $k_0$  is the wave vector of free-space.

The parameter setting of the human brain was based on the institution standards of IEEE and IEC (For more specific parameters, please refer to Comsol's official website). The parameters used in this model are shown in the following table:

**Table 1** The parameters of the model

| Component                       | Value | unit              |
|---------------------------------|-------|-------------------|
| Permittivity of brain tissue    | 58.13 | -                 |
| Conductivity of brain tissue    | 1.15  | S/m               |
| Density of brain tissue         | 1030  | kg/m <sup>3</sup> |
| Specific heat capacity of blood | 3639  | J/(kg·K)          |
| Density of blood                | 1000  | kg/m <sup>3</sup> |
| Permittivity of patch antenna   | 5.23  | -                 |

The physical fields of biological heat transfer and Electromagnetic wave were chosen to calculate the change of temperature with electromagnetic radiation.

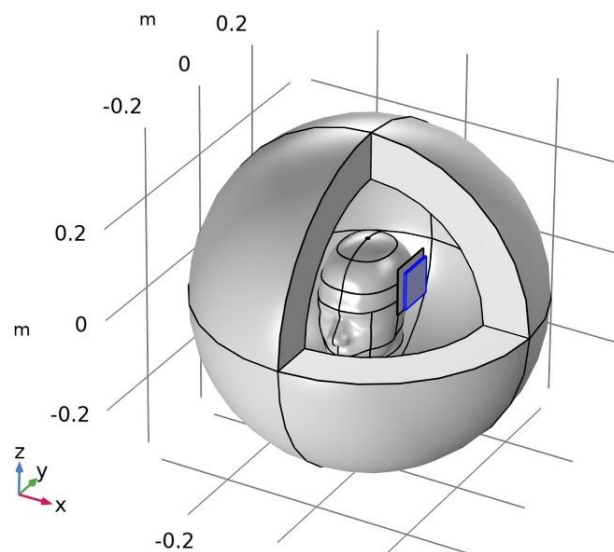

**Fig. S8** The model of about PAg3 surrounding by PML

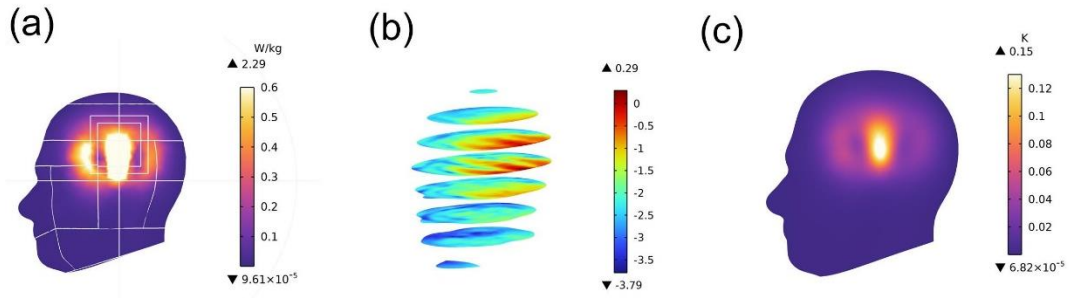

**Fig. S9** (a) SAR of the brain under the irradiation of EM waves (Model 1). (b) Sectional view of SAR of the brain (Model 1). (c) The temperature change of the brain after being irradiated by EM waves (Model 1)

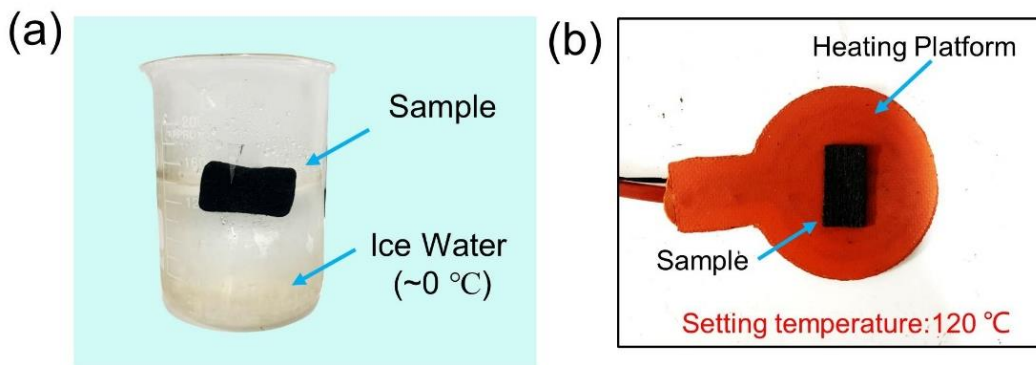

**Fig. S10** Digital images of the PAg3 attached on the ice water (a) and placed on the heating platform (b)

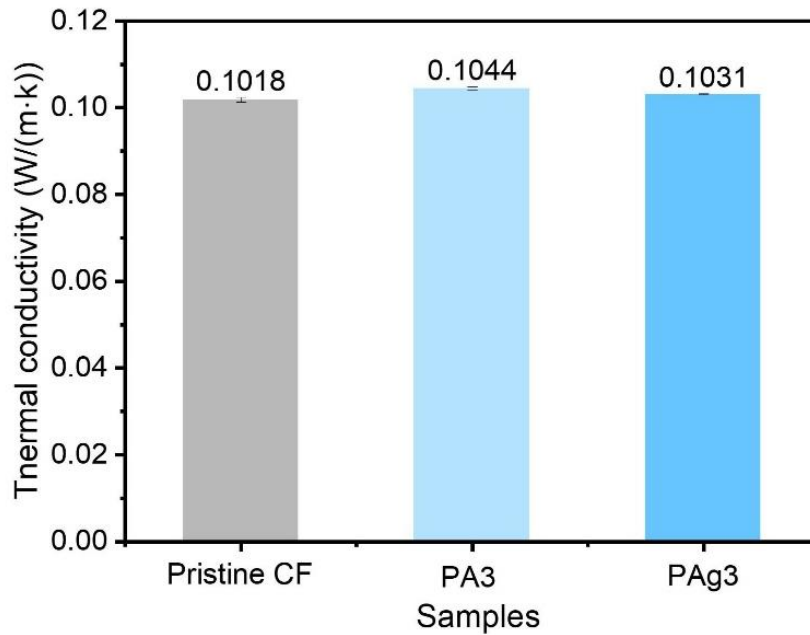

**Fig. S11** The thermal conductivity of the samples

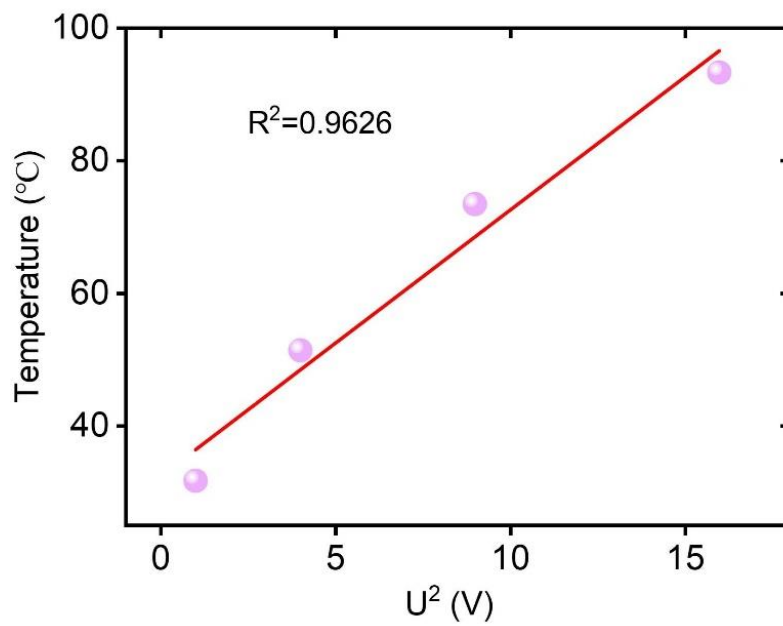

**Fig. S12** T-U<sup>2</sup> curve of the PAg<sub>3</sub>
